# Supplementary material for: Hollow core–shell structured TS-1@S-1 as an efficient catalyst for alkene epoxidation
Source: Royal Society of Chemistry journal article supplement (doi:10.1039/c9ra07893b), 2019-01-01
Supplement: c9ra07893b1.pdf [file c9ra07893b1.pdf]

## Electronic Supplementary Information (ESI)

### **Hollow core-shell structured TS-1@S-1 as an efficient catalyst for alkene epoxidation**

J. Wang, Z. Chen, Y. Yu, Z. Tang, K. Shen, R. Wang, H. Liu, X. Huang, Y. Liu \*

*Shanghai Key Laboratory of Green Chemistry and Chemical Processes, School of Chemistry and Molecular Engineering, East China Normal University, North Zhongshan Rd. 3663, Shanghai 200062, P. R. China*

Corresponding author: Profs. Yueming Liu

Tel/Fax: +86-21-6223-2058

E-mail: [ymliu@chem.ecnu.edu.cn](mailto:ymliu@chem.ecnu.edu.cn) (Y.M. Liu)

## Supplementary information captions:

**Fig. S1** TEM images of HCS-TS with different synthetic contents of H-TS-1.

(a) TEOS: H-TS-1-80=0.25:9.75; (b) TEOS: H-TS-1-80=0.5:9.5;

(c) TEOS: H-TS-1-80=0.75:9.25; (d) TEOS: H-TS-1-80=1:9.

**Fig. S2** N<sub>2</sub> adsorption-desorption isotherms of (a) TS-1; (b) H-TS-1; (c) HCS-TS and (d) HCS-TS<sup>P</sup>.

**Fig. S3** The FT-IR spectra (A and B) of the prepared samples. (a) TS-1; (b) H-TS-1; (c) HCS-TS; (d) HCS-TS<sup>P</sup> and Liquid-infrared spectra of TPOAH.

**Fig. S4** <sup>29</sup>Si MAS NMR spectra of prepared samples. (a) TS-1; (b) H-TS-1; (c) HCS-TS; (d) HCS-TS<sup>P</sup>.

**Fig. S5** TG profile (A) and <sup>13</sup>C MAS NMR spectra (B) of HCS-TS<sup>P</sup> sample.

**Fig. S6** The curve of the conversion of 1-hexene (A) and the curve of I<sub>960/550</sub> (B) with different parent Ti/ (Si+Ti) ratio.

**Fig. S7** The reuse of HCS-TS and HCS-TS<sup>P</sup> in 1-hexene epoxidation.

**Fig. S8** The UV/Vis spectra of the prepared catalysts. (a) TS-1; (b) H-TS-1; (c) CS-TS.

**Fig. S9** TEM images of CS-TS.

**Fig. S10** TEM images of samples with different synthetic conditions: (a) H-TS-1-TEOS; (b) H-TS-1-TPAOH; (c) S-1.

**Table S1.** Physicochemical properties of different samples.

**Table S2.** Elemental composition of different samples.

**Table S3.** Q<sub>3</sub>/Q<sub>4</sub> ratio of different samples.

**Table S4.** Epoxidation of different alkenes with H<sub>2</sub>O<sub>2</sub> over various catalysts.

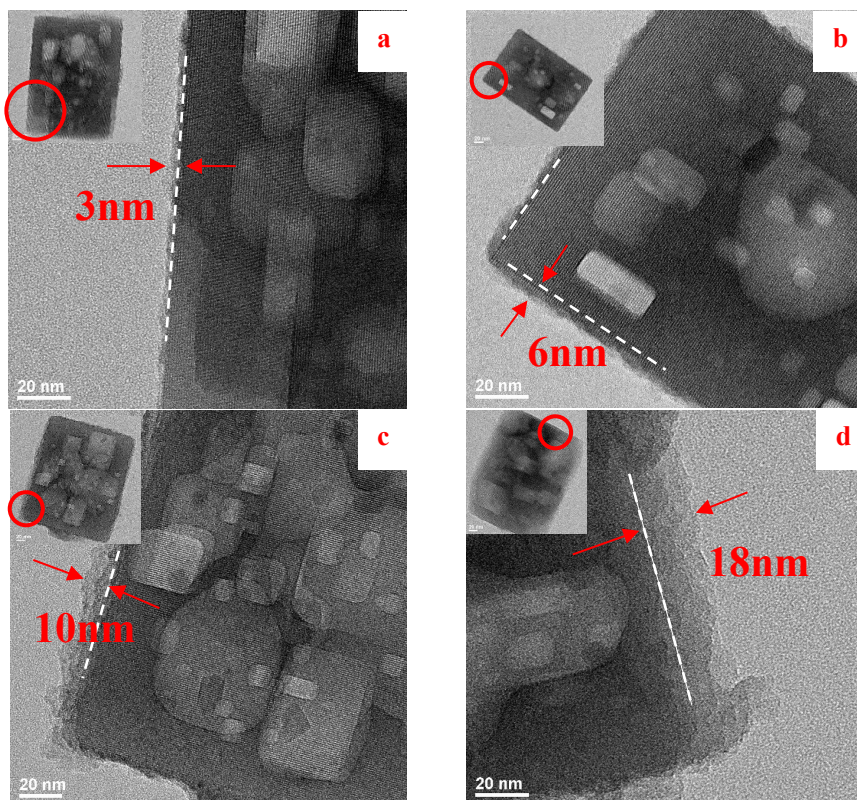

**Fig. S1** TEM images of HCS-TS with different synthetic contents of H-TS-1.

(a) TEOS: H-TS-1-80=0.25: 9.75; (b) TEOS: H-TS-1-80=0.5: 9.5; (c) TEOS: H-TS-1-80=0.75: 9.25; (d) TEOS: H-TS-1-80=1: 9.

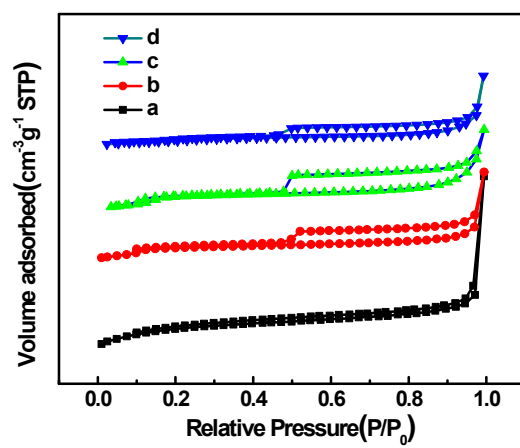

**Fig. S2** N<sub>2</sub> adsorption-desorption isotherms of (a) TS-1; (b) H-TS-1; (c) HCS-TS and (d) HCS-TS<sup>P</sup>.

**Table S1.** Physicochemical properties of different samples.

| No. | Samples             | $S_{\text{micro.}} \text{ (m}^2\text{g}^{-1})^{\text{a}}$ | $S_{\text{exter.}} \text{ (m}^2\text{g}^{-1})^{\text{a}}$ | $V_{\text{tol.}} \text{ (cm}^3\text{g}^{-1})^{\text{a}}$ | $V_{\text{micro.}} \text{ (cm}^3\text{g}^{-1})^{\text{a}}$ | $V_{\text{meso.}} \text{ (cm}^3\text{g}^{-1})^{\text{a}}$ |
|-----|---------------------|-----------------------------------------------------------|-----------------------------------------------------------|----------------------------------------------------------|------------------------------------------------------------|-----------------------------------------------------------|
| 1   | TS-1                | 322                                                       | 54                                                        | 0.22                                                     | 0.138                                                      | 0.079                                                     |
| 2   | H-TS-1              | 314                                                       | 51                                                        | 0.43                                                     | 0.136                                                      | 0.292                                                     |
| 3   | HCS-TS              | 358                                                       | 57                                                        | 0.42                                                     | 0.150                                                      | 0.271                                                     |
| 4   | HCS-TS <sup>P</sup> | 101                                                       | 68                                                        | 0.31                                                     | 0.047                                                      | 0.260                                                     |

<sup>a</sup> Obtained by BET method. Calculated by BET method.  $S_{\text{micro}}(\text{m}^2\text{g}^{-1})$ ,  $V_{\text{micro}}(\text{cm}^3\text{g}^{-1})$  and  $V_{\text{meso}}(\text{cm}^3\text{g}^{-1})$  stand for microporous surface area, microporous volume and mesoporous volume, respectively.

**Table S2.** Elemental composition of different samples.

| No. | Samples             | Si/Ti (Bulk) <sup>a</sup> | Si/Ti (Surface) <sup>b</sup> | Ti2p3/2 BE (eV) <sup>b</sup> |
|-----|---------------------|---------------------------|------------------------------|------------------------------|
| 1   | TS-1                | 90                        | 159                          | 460.5                        |
| 2   | H-TS-1              | 90                        | 184                          | 460.5                        |
| 3   | HTS-CS              | 98                        | 229                          | 460.5                        |
| 4   | HTS-CS <sup>P</sup> | 98                        | 216                          | 460.5 , 459.1                |

<sup>a</sup> Detected by ICP.

<sup>b</sup> Detected by XPS.

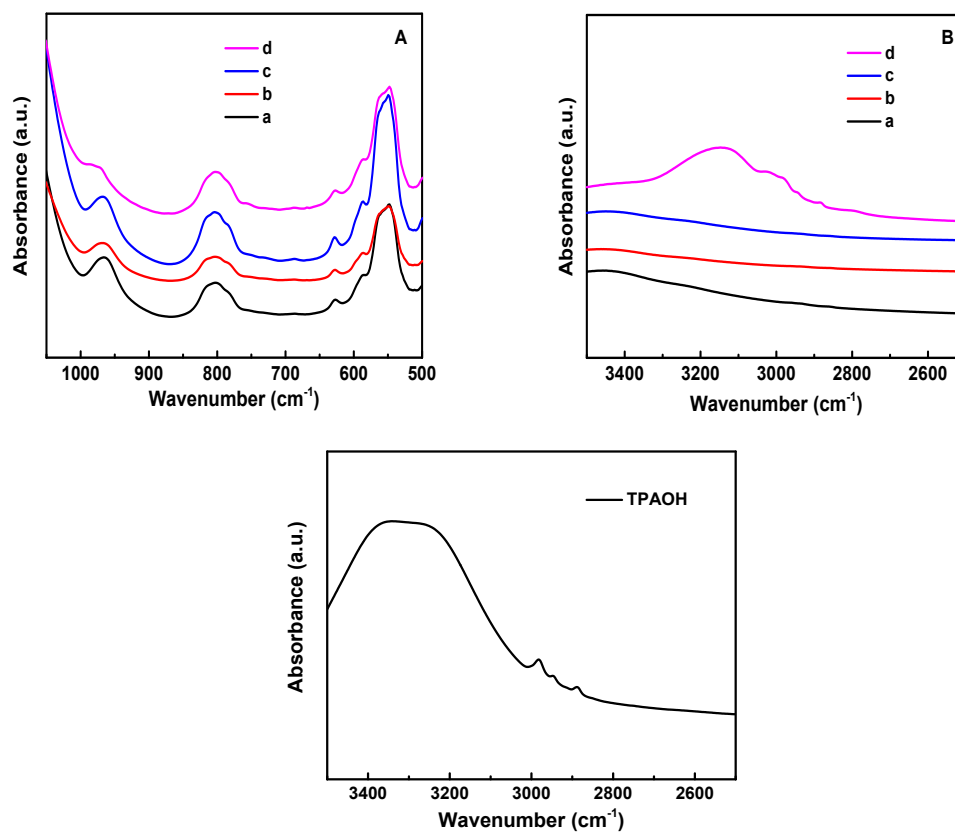

**Fig. S3** The FT-IR spectra (A and B) of the prepared samples. (a) TS-1; (b) H-TS-1; (c) HCS-TS; (d) HCS-TS<sup>P</sup> and Liquid-infrared spectra of TPOAH.

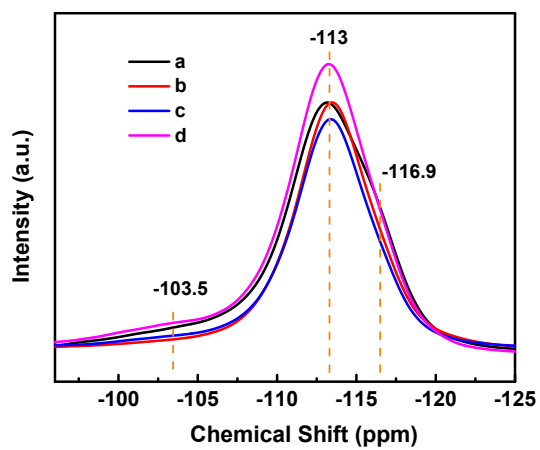

**Fig. S4**  $^{29}\text{Si}$  MAS NMR spectra of prepared samples: (a) TS-1; (b) H-TS-1; (c) HCS-TS; (d) HCS-TS<sup>P</sup>.

**Table S3.**  $Q_3/Q_4$  ratio of different samples.

|           | TS-1  | H-TS-1 | HCS-TS | HCS-TS <sup>P</sup> |
|-----------|-------|--------|--------|---------------------|
| $Q_3/Q_4$ | 11.7% | 8.1%   | 10.5%  | 10.0%               |



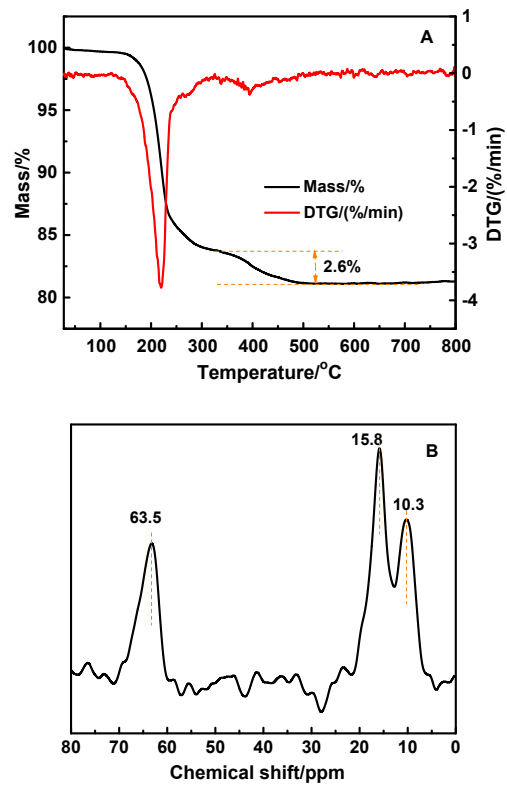

**Fig. S5** TGA profile (A) and <sup>13</sup>C MAS NMR spectra (B) of HCS-TSP sample.

**Table S4.** Epoxidation of different alkenes with H<sub>2</sub>O<sub>2</sub> over various catalysts.

|     |                     |                    | 1-Hexene        |                                         |                                        |              |     |  |  |
|-----|---------------------|--------------------|-----------------|-----------------------------------------|----------------------------------------|--------------|-----|--|--|
| No. | Catalyst            | Si/Ti <sup>a</sup> | Conv.(1-Hex.)/% | Conv.(H <sub>2</sub> O <sub>2</sub> )/% | Eff.(H <sub>2</sub> O <sub>2</sub> )/% | Sel.(Epo.)/% | TON |  |  |
| 1   | TS-1                | 90                 | 16.5            | 19.3                                    | 85.2                                   | 98.9         | 180 |  |  |
| 2   | H-TS-1              | 90                 | 16.4            | 19.5                                    | 83.7                                   | 97.4         | 179 |  |  |
| 3   | HTS-CS              | 98                 | 21.5            | 25.3                                    | 84.9                                   | 97.8         | 256 |  |  |
| 4   | HTS-CS <sup>P</sup> | 98                 | 25.1            | 27.7                                    | 86.1                                   | 95.0         | 299 |  |  |

  

|     |                     |                    | Cyclopentene |                                         |                                        |              | Cyclohexene |         |     |
|-----|---------------------|--------------------|--------------|-----------------------------------------|----------------------------------------|--------------|-------------|---------|-----|
| No. | Catalyst            | Si/Ti <sup>a</sup> | Conv./%      | Conv.(H <sub>2</sub> O <sub>2</sub> )/% | Eff.(H <sub>2</sub> O <sub>2</sub> )/% | Sel.(Epo.)/% | TON         | Conv./% | TON |
| 1   | TS-1                | 90                 | 23.8         | 34.6                                    | 67.8                                   | 98.7         | 260         | 0.5     | -   |
| 2   | H-TS-1              | 90                 | 20.3         | 27.2                                    | 74.6                                   | 99.3         | 222         | 0.5     | -   |
| 3   | HTS-CS              | 98                 | 23.8         | 28.3                                    | 82.9                                   | 98.6         | 283         | 0.4     | -   |
| 4   | HTS-CS <sup>P</sup> | 98                 | 48.1         | 52.7                                    | 87.7                                   | 96.1         | 572         | 0.9     | -   |

Reaction conditions: cat. 50mg, alkene 10mmol, H<sub>2</sub>O<sub>2</sub> 10mmol, CH<sub>3</sub>OH 10ml, Temp. 333K, time 2h.

a Detected by ICP.

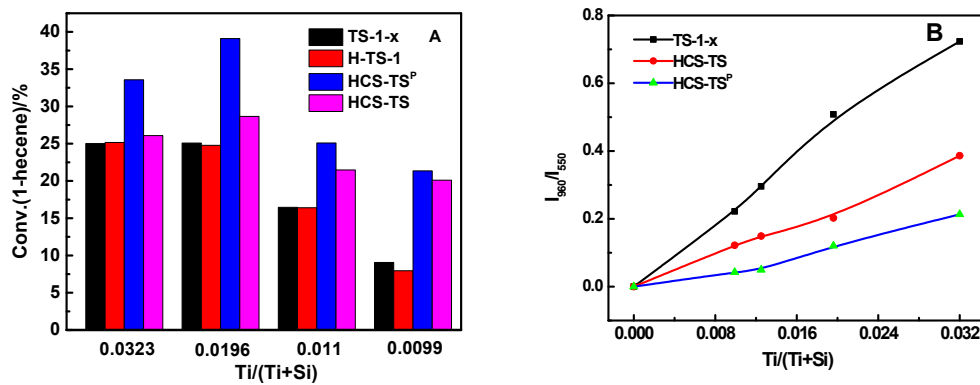

**Fig. S6** The curve of the conversion of 1-hexene (A) and the curve of  $I_{960/550}$  (B) with different parent Ti/(Si+Ti) ratio.

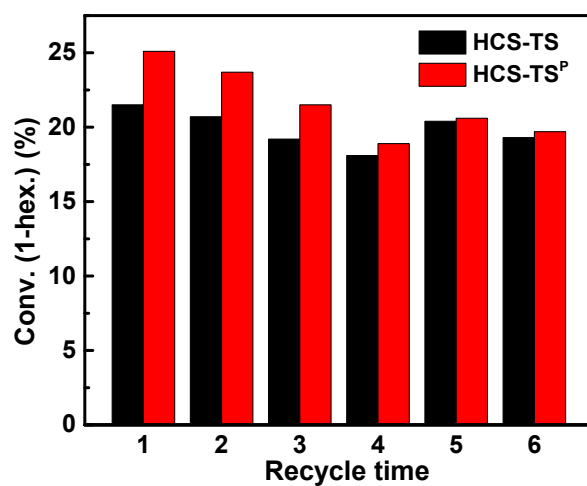

**Fig. S7** The reuse of HCS-TS and HCS-TS<sup>P</sup> in 1-hexene epoxidation.

Reaction conditions for the first run: catalyst: 0.1g, 1-hexene: 10mmol, H<sub>2</sub>O<sub>2</sub>: 10mmol, CH<sub>3</sub>OH: 10ml, Temp.: 333K, time: 2h. The next catalytic runs proceed at a constant ratio of catalyst-oxidant-solvent. (1-4: the samples were recycled after separation by centrifugation then washed with acetone and reused in the conversion of 1-hexene; 5, 6: the samples were recycled after being calcined at 823 K for 6 h and reused in the conversion of 1-hexene).

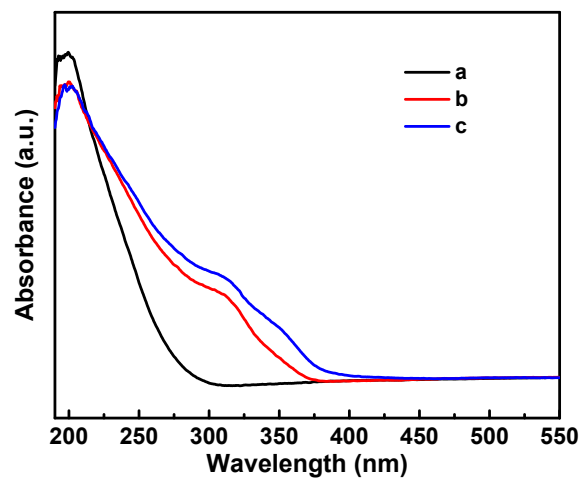

**Fig. S8** The UV/Vis spectra of the prepared catalysts. (a) TS-1; (b) H-TS-1; (c) CS-TS.

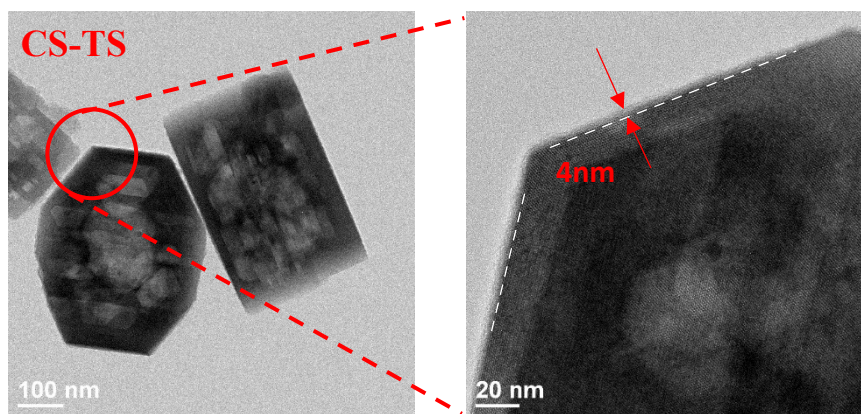

**Fig. S9** TEM images of CS-TS.

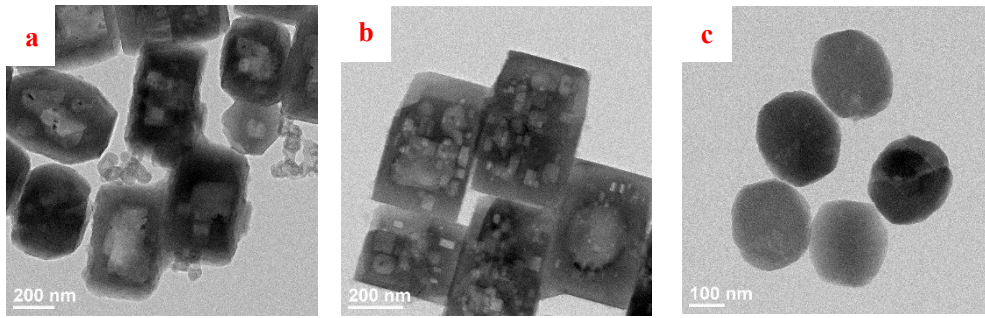

**Fig. S10** TEM images of samples with different synthetic conditions: (a) H-TS-1-TEOS; (b) H-TS-1-TPAOH; (c) S-1.
